# Supplementary material for: Temporal multiplexing of perception and memory codes in IT cortex
Source: PubMed Central journal article supplement (PMC11111405; doi:10.1038/s41586-024-07349-5), 2024-05-15
Supplement: 41586_2024_7349_MOESM2_ESM.pdf [file 41586_2024_7349_MOESM2_ESM.pdf]

## Reporting Summary

Nature Portfolio wishes to improve the reproducibility of the work that we publish. This form provides structure for consistency and transparency in reporting. For further information on Nature Portfolio policies, see our [Editorial Policies](#) and the [Editorial Policy Checklist](#).

### Statistics

For all statistical analyses, confirm that the following items are present in the figure legend, table legend, main text, or Methods section.

n/a Confirmed

- The exact sample size ( $n$ ) for each experimental group/condition, given as a discrete number and unit of measurement
- A statement on whether measurements were taken from distinct samples or whether the same sample was measured repeatedly
- The statistical test(s) used AND whether they are one- or two-sided  
*Only common tests should be described solely by name; describe more complex techniques in the Methods section.*
- A description of all covariates tested
- A description of any assumptions or corrections, such as tests of normality and adjustment for multiple comparisons
- A full description of the statistical parameters including central tendency (e.g. means) or other basic estimates (e.g. regression coefficient) AND variation (e.g. standard deviation) or associated estimates of uncertainty (e.g. confidence intervals)
- For null hypothesis testing, the test statistic (e.g.  $F$ ,  $t$ ,  $r$ ) with confidence intervals, effect sizes, degrees of freedom and  $P$  value noted  
*Give  $P$  values as exact values whenever suitable.*
- For Bayesian analysis, information on the choice of priors and Markov chain Monte Carlo settings
- For hierarchical and complex designs, identification of the appropriate level for tests and full reporting of outcomes
- Estimates of effect sizes (e.g. Cohen's  $d$ , Pearson's  $r$ ), indicating how they were calculated

*Our web collection on [statistics for biologists](#) contains articles on many of the points above.*

### Software and code

Policy information about [availability of computer code](#)

Data collection

Electrophysiological signals were collected by Plexon system. Gaze position was monitored using ISCAN system. All other experimental parameters were recorded using a custom software Kofiko (<https://github.com/shayo/Kofiko>) (version: Feb/4/2014). The electrode trajectories were planned using custom software (<https://github.com/shayo/Planner>) (Revision 93 Feb/19/2014).

Data analysis

Functional imaging data are processed with Freesurfer and FSL. Multichannel recorded electrophysiological data was automatically sorted by Kilosort2 ([github.com/MouseLand/Kilosort2](https://github.com/MouseLand/Kilosort2)) and manually refined in Phy ([github.com/cortex-lab/phy](https://github.com/cortex-lab/phy)). Custom code written in MATLAB was used for analysis. The code that reproduce the core results are available at <https://doi.org/10.5281/zenodo.10460607>. All other code is available from the lead corresponding author upon reasonable request.

For manuscripts utilizing custom algorithms or software that are central to the research but not yet described in published literature, software must be made available to editors and reviewers. We strongly encourage code deposition in a community repository (e.g. GitHub). See the Nature Portfolio [guidelines for submitting code & software](#) for further information.

## Data

Policy information about [availability of data](#)

All manuscripts must include a [data availability statement](#). This statement should provide the following information, where applicable:

- Accession codes, unique identifiers, or web links for publicly available datasets
- A description of any restrictions on data availability
- For clinical datasets or third party data, please ensure that the statement adheres to our [policy](#)

The data set of neural responses to thousand monkey face set are available at <https://doi.org/10.5281/zenodo.1046067>.

PrimFace database: <http://visiome.neuroinf.jp/primface>

FERET database: <https://www.nist.gov/itl/products-and-services/color-feret-database>

CVL Face Database: <http://www.lrv.fri.uni-lj.si/facedb.html>

MR2 face database: <https://osf.io/skbq2/>

Chicago Face Database: <https://www.chicagofaces.org/>

CelebA CelebFaces Attributes Dataset: <https://mmlab.ie.cuhk.edu.hk/projects/CelebA.html>

FEI Face Database: [fei.edu.br/~cet/facedatabase.html](http://fei.edu.br/~cet/facedatabase.html)

PICS Psychological Image Collection at Stirling: [pics.stir.ac.uk](http://pics.stir.ac.uk)

Caltech faces 1999: <https://data.caltech.edu/records/6rjah-hdv18>

Essex Face Recognition Data: <http://cswww.essex.ac.uk/mv/allfaces/faces95.html>

The MUCT Face Database: [www.milbo.org/muct](http://www.milbo.org/muct)

All other data are available from the lead corresponding author upon reasonable request.

## Research involving human participants, their data, or biological material

Policy information about studies with [human participants or human data](#). See also policy information about [sex, gender \(identity/presentation\), and sexual orientation](#) and [race, ethnicity and racism](#).

Reporting on sex and gender

N/A

Reporting on race, ethnicity, or other socially relevant groupings

N/A

Population characteristics

N/A

Recruitment

N/A

Ethics oversight

N/A

Note that full information on the approval of the study protocol must also be provided in the manuscript.

## Field-specific reporting

Please select the one below that is the best fit for your research. If you are not sure, read the appropriate sections before making your selection.

Life sciences

Behavioural & social sciences

Ecological, evolutionary & environmental sciences

For a reference copy of the document with all sections, see [nature.com/documents/nr-reporting-summary-flat.pdf](https://www.nature.com/documents/nr-reporting-summary-flat.pdf)

## Life sciences study design

All studies must disclose on these points even when the disclosure is negative.

Sample size

Sample sizes were chosen in a manner commensurate with similar previous studies.

Data exclusions

We recorded from every neuron encountered. Only visual responsive units were considered for further analysis.

Replication

Results were replicated across 2-3 different animals for each experiment independently.

Randomization

The visual stimuli were shown in a random order. Organisms random allocation is not relevant to this study, different subjects were used to repeat the same experimental condition.

Blinding

Investigators were not blinded to experimental groups due to the nature of the experiments.

## Reporting for specific materials, systems and methods

We require information from authors about some types of materials, experimental systems and methods used in many studies. Here, indicate whether each material, system or method listed is relevant to your study. If you are not sure if a list item applies to your research, read the appropriate section before selecting a response.

## Materials & experimental systems

- n/a | Involved in the study
- Antibodies
- Eukaryotic cell lines
- Palaeontology and archaeology
- Animals and other organisms
- Clinical data
- Dual use research of concern
- Plants

## Methods

- n/a | Involved in the study
- ChIP-seq
- Flow cytometry
- MRI-based neuroimaging

## Animals and other research organisms

Policy information about [studies involving animals](#); [ARRIVE guidelines](#) recommended for reporting animal research, and [Sex and Gender in Research](#)

- Laboratory animals
- Wild animals
- Reporting on sex
- Field-collected samples
- Ethics oversight

Note that full information on the approval of the study protocol must also be provided in the manuscript.

## Magnetic resonance imaging

### Experimental design

- Design type
- Design specifications
- Behavioral performance measures

### Acquisition

- Imaging type(s)
- Field strength
- Sequence & imaging parameters
- Area of acquisition
- Diffusion MRI  Used  Not used

### Preprocessing

- Preprocessing software
- Normalization

|                            |                                                                                                                         |
|----------------------------|-------------------------------------------------------------------------------------------------------------------------|
| Normalization template     | We did not normalize any imaging data into template. All the analysis were done in the single subject's original space. |
| Noise and artifact removal | We remove the linear or quadratic trends in the timeseries.                                                             |
| Volume censoring           | Motion noises were removed by putting the motion parameters as the regressors in the GLM analysis.                      |

## Statistical modeling & inference

|                                           |                                                                                                                  |
|-------------------------------------------|------------------------------------------------------------------------------------------------------------------|
| Model type and settings                   | The analysis used only first-level analysis.                                                                     |
| Effect(s) tested                          | We ran t-tests between different conditions within each single subject.                                          |
| Specify type of analysis:                 | <input checked="" type="checkbox"/> Whole brain <input type="checkbox"/> ROI-based <input type="checkbox"/> Both |
| Statistic type for inference              | All the analyses were done using voxel-wise inference.                                                           |
| (See <a href="#">Eklund et al. 2016</a> ) |                                                                                                                  |
| Correction                                | We did not apply any multiple-comparison correction in the fMRI imaging analysis.                                |

## Models & analysis

|                                     |                                                                       |
|-------------------------------------|-----------------------------------------------------------------------|
| n/a                                 | Involvement in the study                                              |
| <input checked="" type="checkbox"/> | <input type="checkbox"/> Functional and/or effective connectivity     |
| <input checked="" type="checkbox"/> | <input type="checkbox"/> Graph analysis                               |
| <input checked="" type="checkbox"/> | <input type="checkbox"/> Multivariate modeling or predictive analysis |
